# Supplementary material for: Alseodaphnopsis: A new genus of Lauraceae based on molecular and morphological evidence
Source: PubMed Central journal article supplement (PMC5646853; doi:10.1371/journal.pone.0186545), 2017-10-18

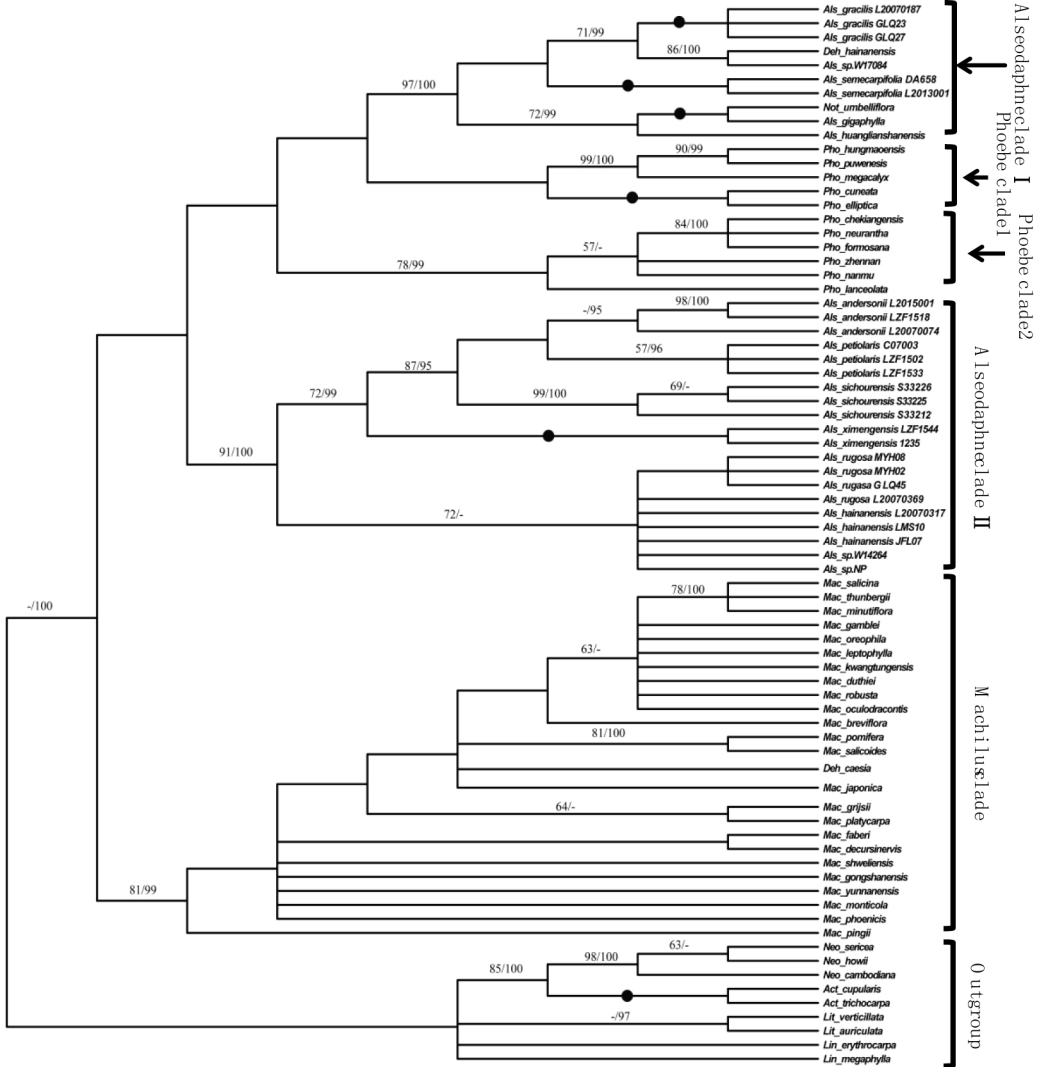

Supplement: pone.0186545.s004.pdf [file pone.0186545.s004.pdf]
